# Supplementary material
Source: Springer Nature journal article supplement (https://www.springermedizin.de/resource/supplementary/12958_2011_855_MOESM2_ESM.pdf/9569028)

# PMNs within the CL

(A) Day 1-2

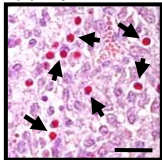

(B) Day 3-4

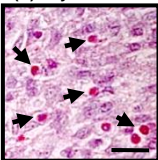

(C) Day 5-7

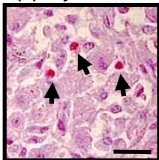

(D) Day 8-12

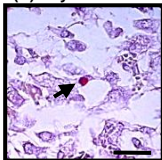

(E) Day 13-16

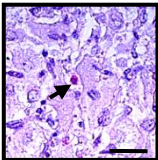

(F) Day 18-20

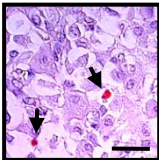

50µm

Supplement: MOESM2 [file 9569028]
